# Supplementary material for: Ire1-mediated decay in mammalian cells relies on mRNA sequence, structure, and translational status
Source: PubMed Central journal article supplement — Mol Biol Cell. 2015 Aug 15;26(16):2873–84. doi: 10.1091/mbc.E15-02-0074 (PMC4571326; doi:10.1091/mbc.e15-02-0074), 2015-08-15
Supplement: supp_E15-02-0074v1_CombinedSupMats.pdf [file supp_E15-02-0074v1_CombinedSupMats.pdf]

# Supplemental Materials

*Molecular Biology of the Cell*

Moore et al.

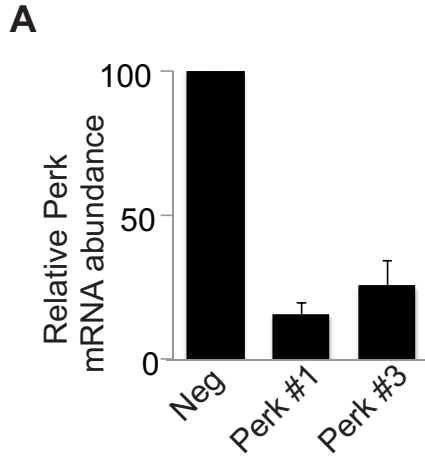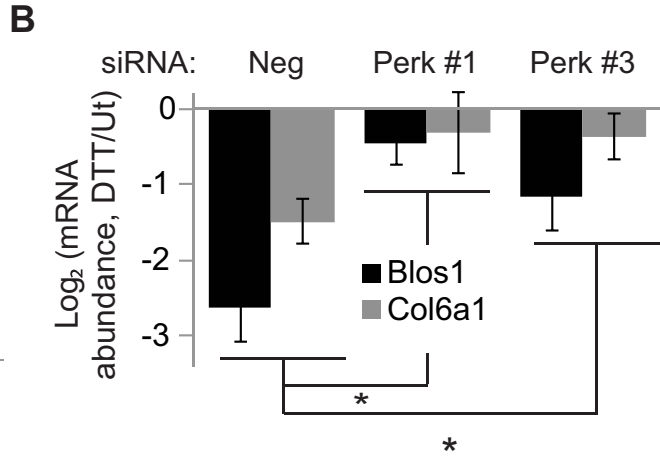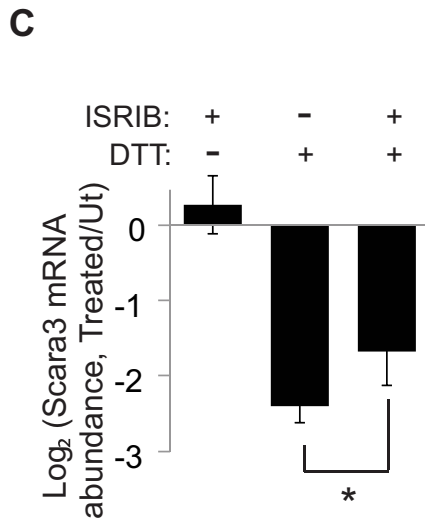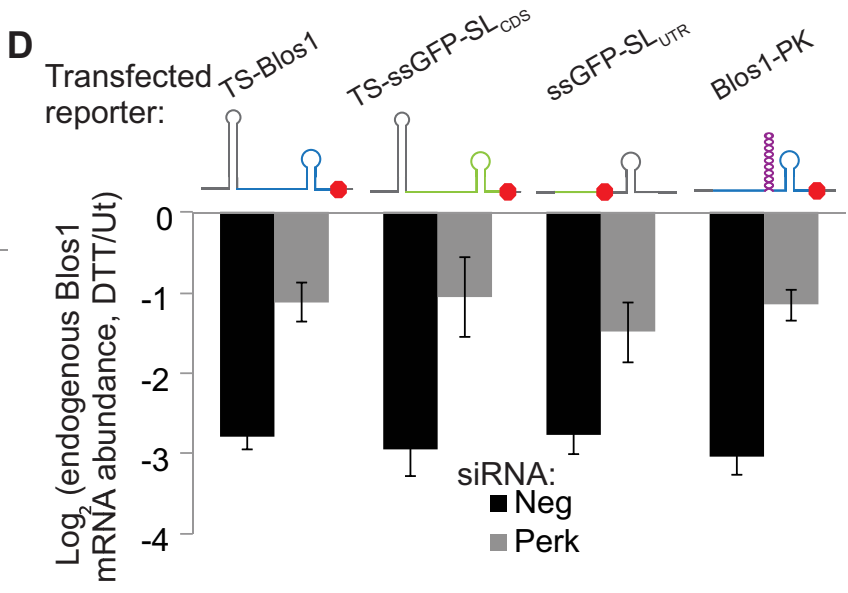

**Supplemental Figure 1.** (A-B) We transfected MC3T3-E1 cells with two different siRNAs targeting the Perk transcript (Perk #1 or Perk #3). We measured percent of Perk mRNA remaining (A) and RIDD target mRNA levels (B) after incubation with or without 1 mM DTT for 4 h. (C) Scara3 relative mRNA abundance in MC3T3-E1 cells treated with 500 nM ISRIB, 1 mM DTT, or both for 4 h. Samples are identical to those in Figure 4F. (D) Relative mRNA abundance of endogenous Blos1 from stably transfected cell lines expressing Perk-insensitive RIDD reporters. Samples are identical to those used to measure the reporter mRNA levels in Fig. 5C, 5B, 6B, and 6D. Shown are averages and standard deviations of at least 3 independent experiments. \* $p < 0.05$ , two tailed paired t-test. Ut, untreated.
